# Supplementary material for: Facile synthesis of viologen and its reversible lithium storage property in organic lithium-ion batteries
Source: Royal Society of Chemistry journal article supplement (doi:10.1039/c5ra20301e), 2015-01-01
Supplement: c5ra20301e1.pdf [file c5ra20301e1.pdf]

## Electronic supplementary for

Facile synthesis of viologen and its reversible lithium storage property in organic lithium-ion batteries

Arnab Ghosh and Sagar Mitra\*

Department of Energy Science and Engineering, IIT Bombay, Powai, Mumbai 400076, India.

\*Corresponding author: E-mail: [sagar.mitra@iitb.ac.in](mailto:sagar.mitra@iitb.ac.in)

Theoretical gravimetric capacity ( $C_g$ ) of a redox-active molecule is calculated by the reported procedure.<sup>1</sup>

Theoretical gravimetric capacity =  $(26800n/M)$

Where  $n$  = number of electrons involved in the redox reaction of per redox-active molecule

$M$  = molecular weight of the redox-active molecule

Now for BTFV,  $n = 2$  and  $M = 292 \text{ g mol}^{-1}$

Therefore, theoretical capacity ( $C_g$ ) of BTFV =  $(26800 \times 2 / 292) \text{ mAh g}^{-1} = 183.5 \text{ mAh g}^{-1}$ .

### Materials required

4, 4'-bipyridine, Acetonitrile and polyethylene oxide (PEO) were purchased from Sigma Aldrich, diethyl etherated boron trifluoride was from Alfa Aesar, diethyl ether from Merck, conducting carbon black (super P) from Timcal.

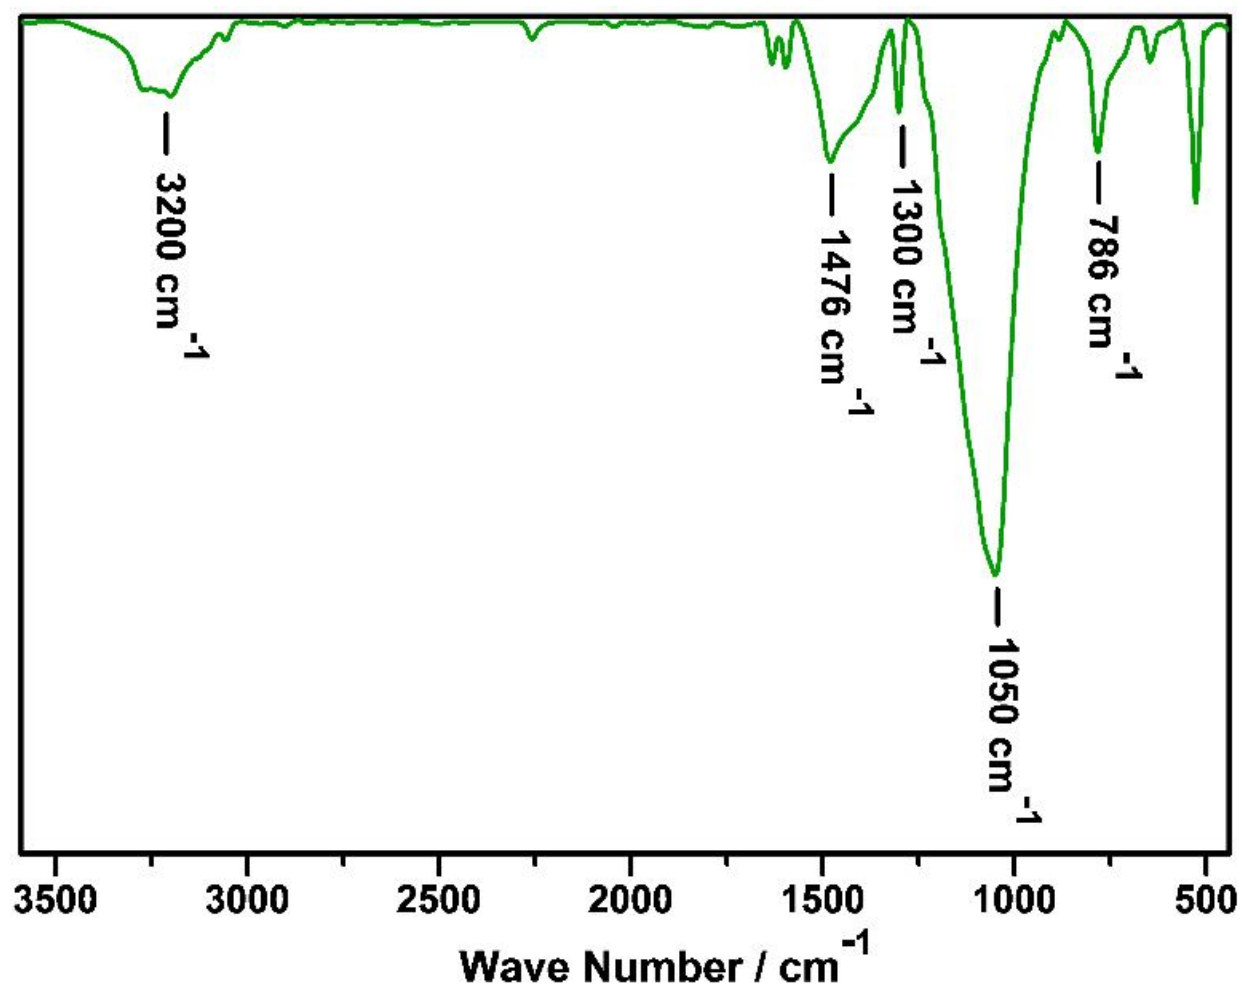

**Figure S1.** FTIR spectra of N, N-di-(boron trifluoride)-4, 4'-bipyridine (BTFV).

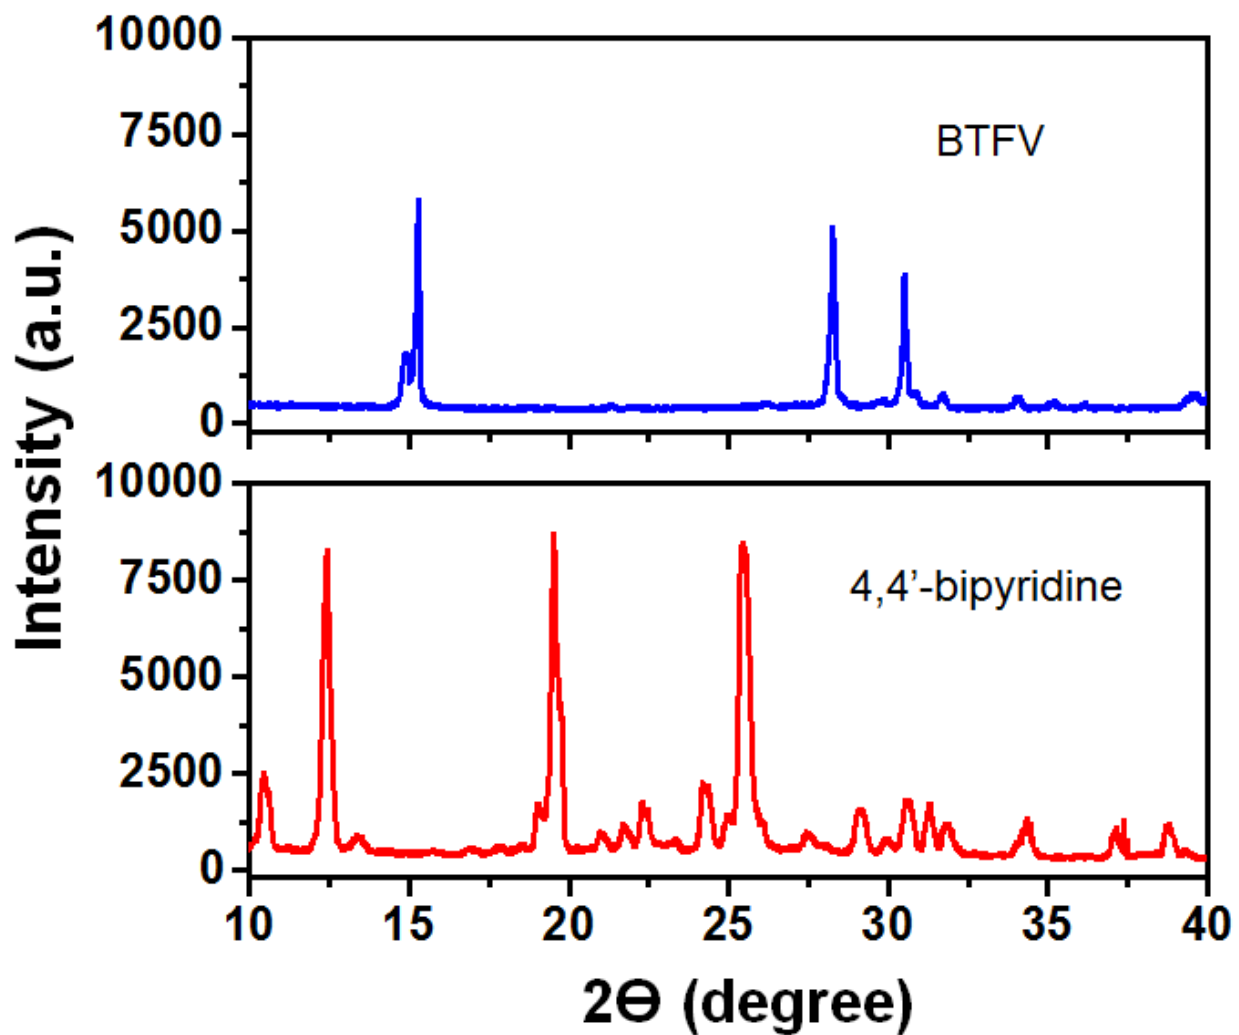

**Figure S2.** XRD patterns of 4, 4'-bipyridine and BTFV showing a remarkable difference in crystallinity of 4, 4'-bipyridine upon adduct formation with boron trifluoride.

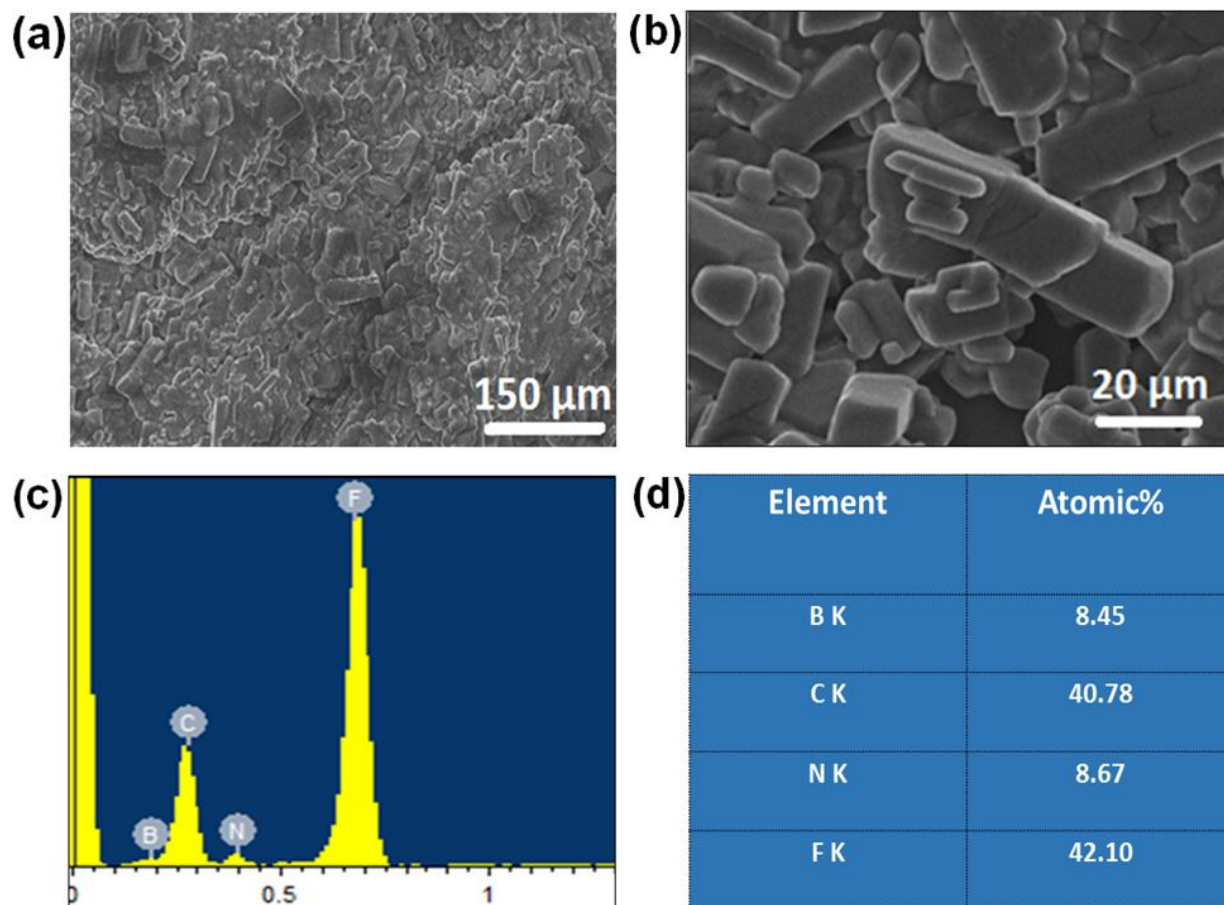

**Figure S3.** Top view FE-SEM images of BTFV at low magnification (a) and (b) at high magnification; (c) EDX spectrum of BTFV; and (d) Atomic percentage of different building atoms for BTFV. BTFV shows a non-uniform and aggregated particles size of several micrometers. The  $\pi$ - $\pi$  stacking interaction between the positively charged 4, 4'-bipyridine rings<sup>2</sup> may be responsible for this aggregation.

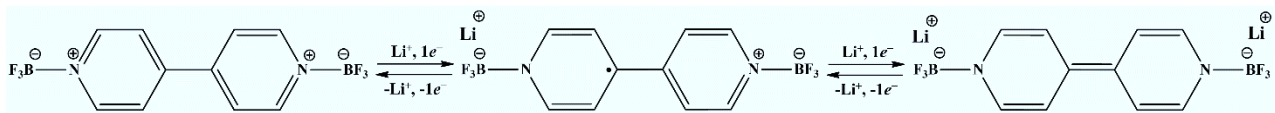

**Figure S4.** Schematic representation of proposed lithium storage mechanism.

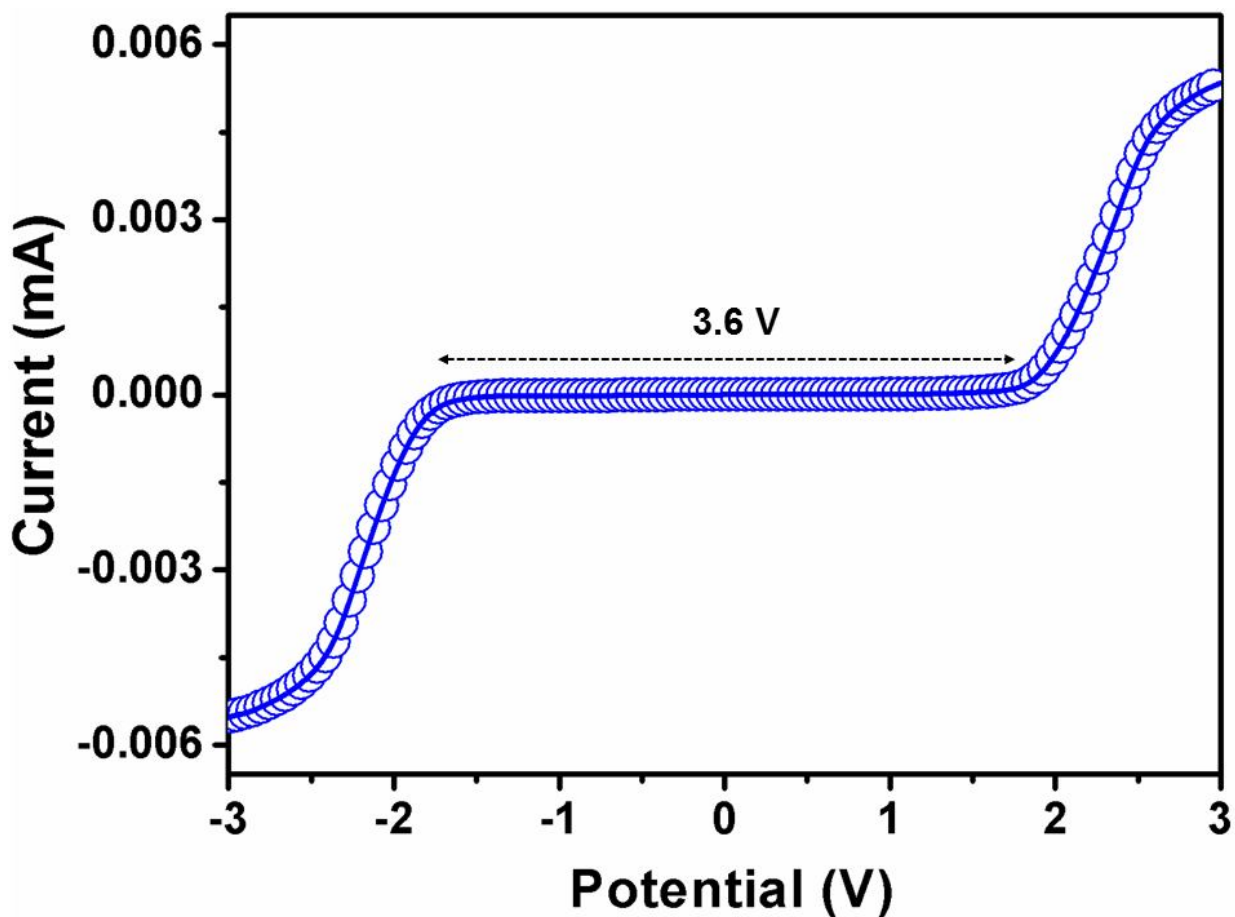

**Figure S5.** LSV plot of the IL-DMF electrolyte recorded at a scan rate of  $20 \text{ mV s}^{-1}$ . The IL-DMF electrolyte is found to be electrochemically stable in the applied bias range of  $-1.8 \text{ V}$  to  $+1.8 \text{ V}$  vs.  $\text{Ag}/\text{Ag}^+$ .

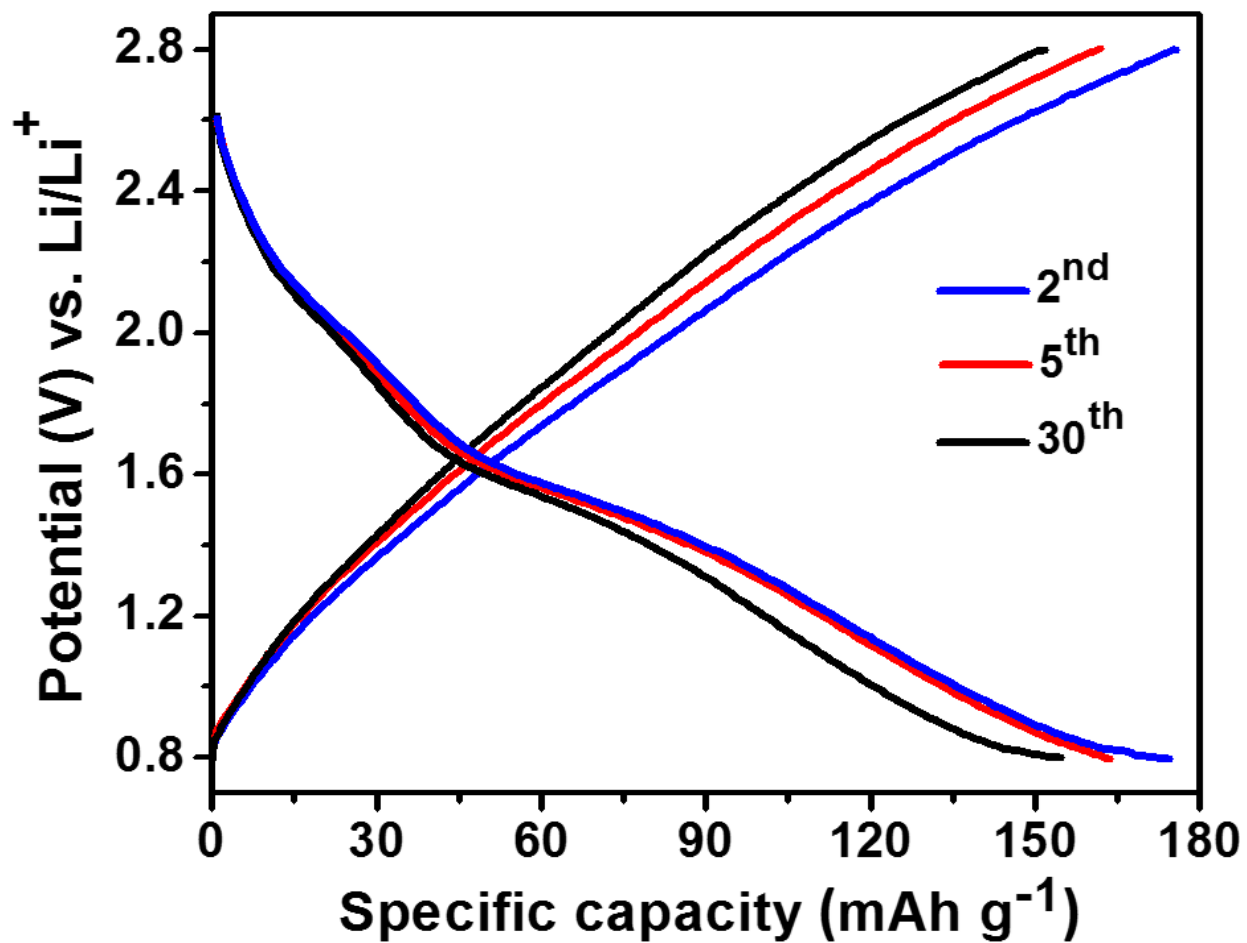

**Figure S6.** Charge-discharge profiles of BTFV at a current rate of 50 mA g<sup>-1</sup> and within the potential range of 0.8-2.8 V vs. Li/Li<sup>+</sup>.

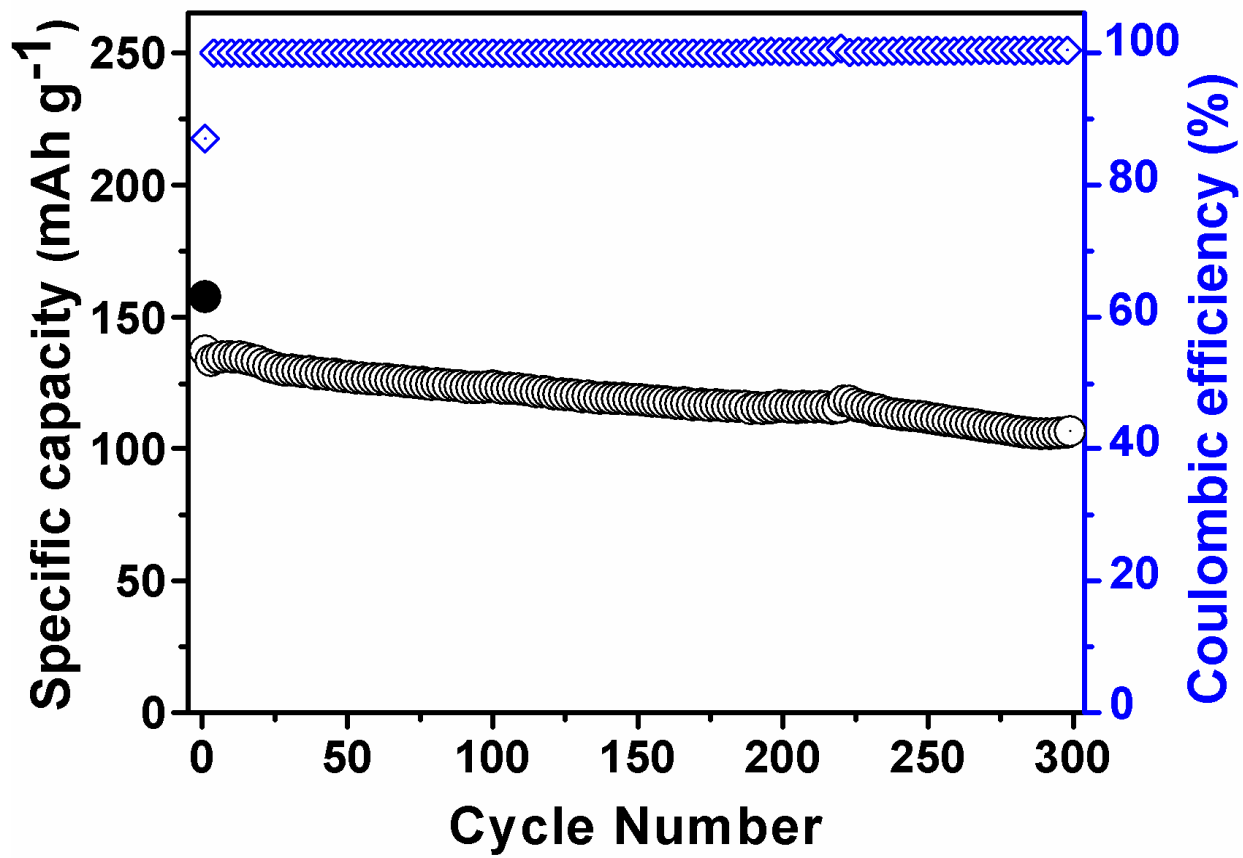

**Figure S7.** Long term cycling performance for BTFV electrode at the current density of 900 mA g<sup>-1</sup> within the potential range 0.01-3.0 V vs. Li/Li<sup>+</sup>.

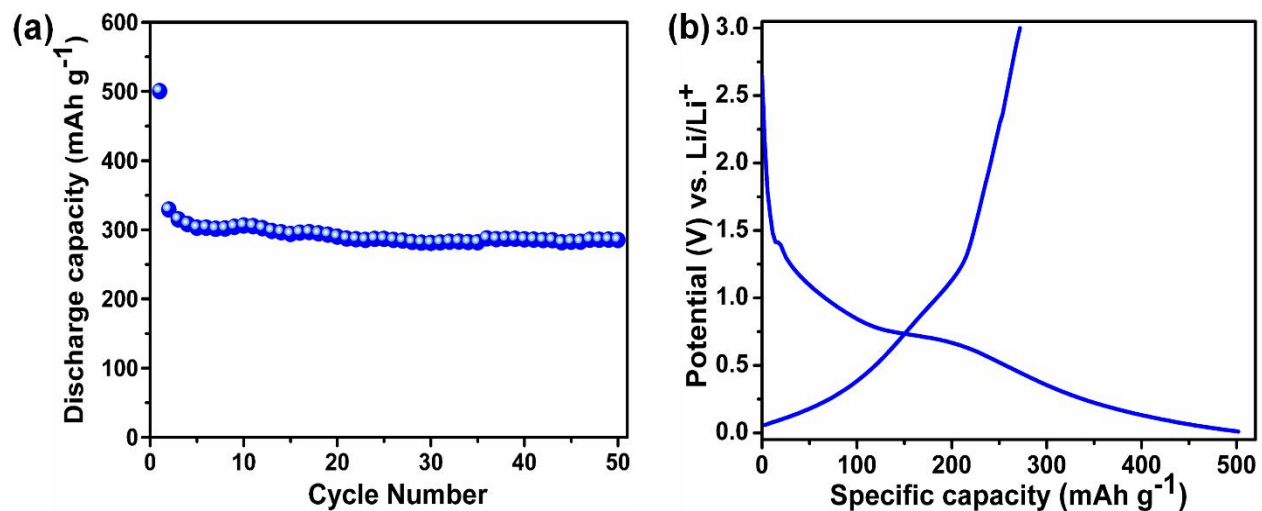

**Figure S8.**(a) Cycling performance for super P carbon at the current density of 50 mA g<sup>-1</sup> within the potential range 0.01-3.0 V vs. Li/Li<sup>+</sup>; (b) First cycle charge-discharge profile for super P carbon at the same current rate (50 mA g<sup>-1</sup>).



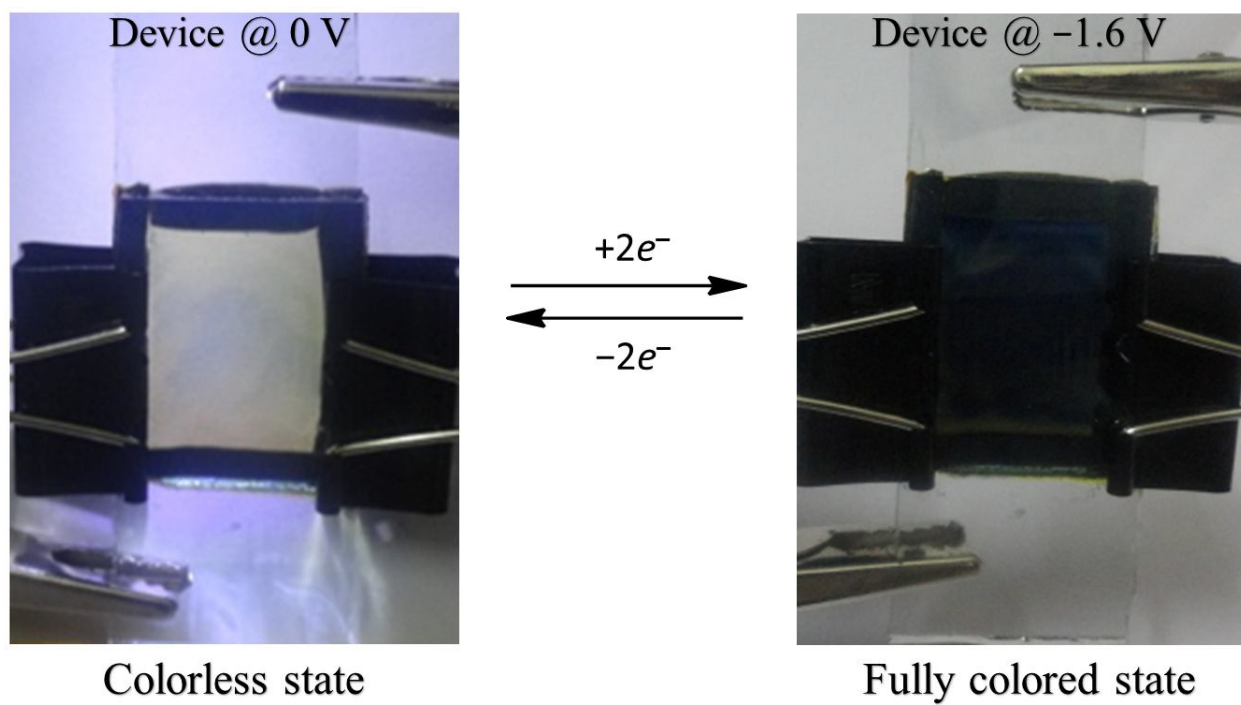

**Figure S9.** Electrochromic behavior of BTFV.

## References

1. C. Han, Z. Li, W.-J. Li, S.-L. Chou and S.-X. Dou, *J. Mater. Chem. A*, 2014, **2**, 11683.
2. X. Yang, J. Li, X. H. Zhao, H. W. Wang and Y. K. Shan, *Acta Crystallogr C.*, 2007, **63**, 171.
